# Supplementary material
Source: PubMed Central journal article supplement (PMC3970499)
Supplement: 1314505111_pnas.201314505SI.pdf [file 1314505111_pnas.201314505SI.pdf]

# Supporting Information

Clement et al. 10.1073/pnas.1314505111

## SI Materials and Methods

**Chemokine (C-C Motif) Receptor Type 7 Expression.** Bone marrow-derived dendritic cells (BMDCs) were induced from bone marrow cells of WT mice and analyzed by flow cytometry after staining with an anti-mouse chemokine (C-C motif) receptor type 7 antibody (clone 4B12; BD Biosciences) coupled to peridinin chlorophyll protein-Cy5.5 (Fig. S1).

**Chemotaxis.** As shown in Fig. S1, unstimulated or LPS-stimulated (100 ng/mL for 24 h) CD31<sup>+/+</sup> and CD31<sup>-/-</sup> BMDCs were labeled with carboxyfluorescein succinimidyl ester (CFSE) and allowed to migrate ( $5 \times 10^5$  BMDCs per well) for 4 h at 37 °C on transwell assay plates (ChemoTx Disposable Chemotaxis System, no. 106-5; Neuroprobe) in which chemokine (C-C) motif ligand 21 (1 µg/mL) was present in the lower chamber. The number of CFSE-labeled dendritic cells in the lower chamber was then evaluated by flow cytometry with a BD LSRII analyzer (BD Biosciences) equipped with a high-throughput screening reader. The data were analyzed with BD Diva software (BD Biosciences).

**Quantification.** To quantify the effect of the CD31 peptide on the internalization of surface CD31 molecules upon LPS stimulation, spleen single-cell suspensions from C57BL/6 mice ( $n = 3$ ,  $10^6$  cells per tube) were stimulated with 1 µg/mL LPS (for 30 min at 37 °C) in the presence of the CD31 peptide (final concentration of 50 µg/mL) or the vehicle (Fig. S2). At the end of the experiment, cells were transferred on ice and processed for cytometric analysis as described in *Materials and Methods*. The antibodies used for these experiments were phycoerythrin-anti-mouse CD31 (clone MEC13.3; BD Biosciences), allophycocyanin-anti-mouse CD11c (clone HL3; BD Biosciences), and BV421-anti-mouse IA<sup>b</sup> (clone M5/114.15.2; Biolegend). In the indicated experiments, intracellular CD31 molecules were detected after fixation [4% (wt/vol) paraformaldehyde for 10 min at 4 °C] and permeabilization (PBS/0.5% Triton X-100 for 10 min), using the antibodies diluted in the permeabilization buffer. Cytometric analysis was performed on a BD LSRII analyzer, as indicated in *Materials and Methods*.

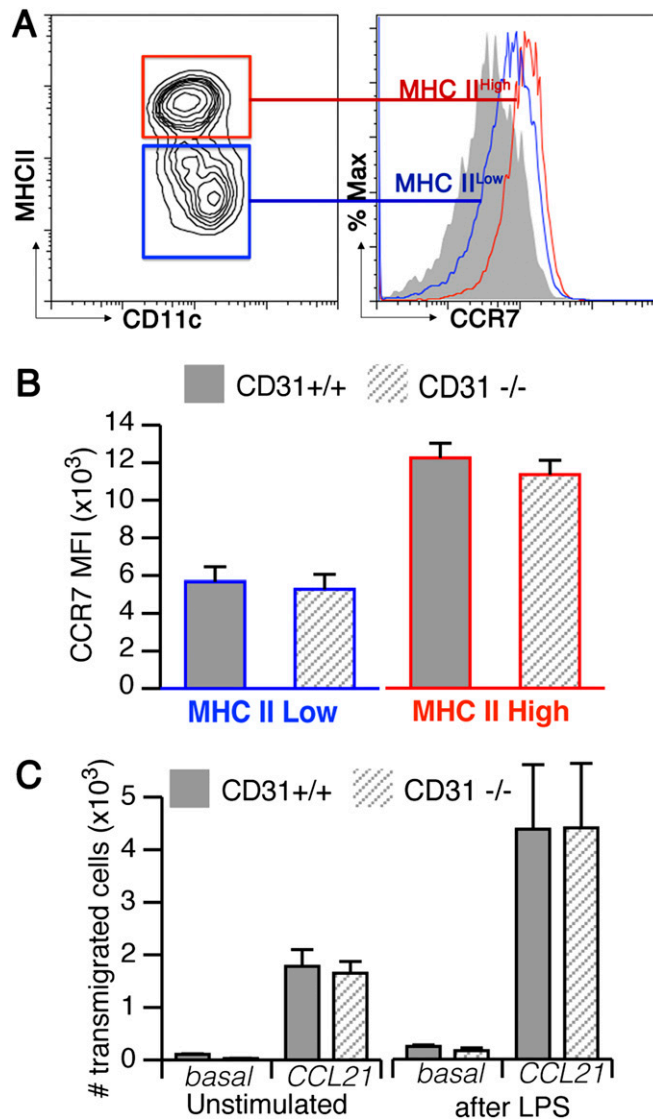

**Fig. S1.** CD31 expression does not modify BMDC migration against chemokine (C-C) motif ligand 21 (CCL21) in vitro. (A) Flow cytometry analysis of surface chemokine (C-C motif) receptor type 7 (CCR7) expression on CD11c<sup>+</sup>, CD31<sup>+/+</sup>, and CD31<sup>-/-</sup> BMDCs based on their maturation state: MHC class II (MHCII)<sup>high</sup> and MHCII<sup>low</sup>. %Max, percentage of maximum. (B) CCR7 expression levels [median fluorescence intensity (MFI)] on CD31<sup>+/+</sup> and CD31<sup>-/-</sup> dendritic cells (DCs) were similar, regardless of the maturation state. (C) BMDCs from CD31<sup>+/+</sup> and CD31<sup>-/-</sup> mice were stimulated or not stimulated with LPS (100 ng/mL) overnight, CFSE-labeled, and allowed to migrate across a transwell chamber, the wells of which contained CCL21 (1  $\mu$ g/mL). Flow cytometric analysis of the CFSE<sup>+</sup> cells that migrated to the lower chamber revealed that there were no differences between CD31<sup>+/+</sup> and CD31<sup>-/-</sup> mice with respect to the numbers of immature and mature DCs.
